# Supplementary material for: Nectar-living yeasts of a tropical host plant community: diversity and effects on community-wide floral nectar traits
Source: PeerJ. 2017 Jul 14;5:e3517. doi: 10.7717/peerj.3517 (PMC5511698; doi:10.7717/peerj.3517)
Supplement: Data S1 — Raw data of the incidence and cell density of nectar-living yeasts on the floral nectar of a tropical host plant community. Three data sets are shown, one used for the diversity analysis (diversity), another applied for the analysis of correspondence between yeasts and host plants (correspondence), and the last one used in the analysis of power model regression of yeast cell density versus concentration of nectar sugars (yeast effects). [file peerj-05-3517-s001.xlsx]

## Sheet: diversity
raw data without singleton species		Frequency data
		ASCOMYCOTA (n)										BASIDIOMYCOTA (n)
INCIDENCE BY SAMPLING UNIT LEVELS	Sampled units	Metschnikowia ipomoeae	Candida sorbosivorans	Candida versatilis	Clavispora lusitaniae	Kurtzmaniella cleridarum	Metschnikowia koreensis	Metschnikowia lochheadii	Metschnikowia sp.	Starmerella sp.	Wickerhamiella occidentalis	Vishniacozyma taibaiensis	Papilotrema flavescens	Saitozyma flava	Cryptococcus laurentii var. laurentii	Cryptococcus sp.1	Cryptococcus sp.2	Naganishia liquefaciens	Hannaella siamensis	Kwoniella mangrovensis	Rhodotorula paludigena	Sporidiobolus ruineniae	Sympodiomycopsis paphiopedili	Ustilago sparsa	Ustilago sp.	Pseudozyma sp.
nectar drops	122	13	5	2	4	12	14	5	6	2	3	4	4	2	12	2	6	6	8	2	2	5	8	6	9	2
individual plant	54	13	3	2	2	12	5	5	4	2	3	2	2	2	11	2	6	1	8	2	2	5	6	6	9	2
plant species	17	3	3	2	1	1	2	2	3	1	3	3	2	2	4	2	1	1	3	1	2	2	5	1	4	2
genus plant	13	3	3	2	1	1	2	2	3	1	2	3	2	1	4	2	1	1	3	1	1	1	4	1	1	1
family plant	10	2	3	1	1	1	2	1	2	1	1	3	2	1	2	2		1	1			1	3	1	1	1
	216

## Sheet: correspondence
raw matrix without singleton species				Incidence data
HOST PLANTS	ASCOMYCOTA									BASIDIOMYCOTA
	Starmerella sp.	Wickerhamiella occidentalis	Candida sorbosivorans	Kurtzmaniella cleridarum	Clavispora lusitaniae	Metschnikowia ipomoeae	Metschnikowia lochheadii	Metschnikowia sp.	Metschnikowia koreensis	Vishniacozyma taibaiensis	Saitozyma flava	Cryptococcus sp.1	Cryptococcus laurentii var. laurentii	Papilotrema flavescens	Cryptococcus sp.2	Naganishia liquefaciens	Hannaella siamensis	Kwoniella mangrovensis	Rhodotorula paludigena	Sporidiobolus ruineniae	Sympodiomycopsis paphiopedili	Ustilago sparsa	Ustilago sp.
Agave angustifolia	0	0	1	0	4	0	0	0	0	0	0	0	0	0	0	0	3	0	0	0	0	0	0
Bravaisia berlandieriana	0	0	0	0	0	0	0	0	0	0	0	1	0	3	0	0	0	0	0	0	0	0	0
Gymnopodium floribundum	0	0	1	0	0	0	0	0	0	0	0	0	1	1	0	0	0	0	0	0	0	0	0
Ipomoea crinicalyx	2	1	0	0	0	8	2	1	0	0	0	0	0	0	0	0	0	0	0	0	0	0	0
Ipomoea hederifolia	0	0	0	0	0	0	0	0	0	0	0	0	3	0	0	0	0	0	0	0	2	5	3
Ipomoea nil	0	1	0	0	0	0	0	0	0	0	1	1	0	0	0	0	0	0	0	1	1	0	1
Ipomoea triloba	0	0	0	0	0	0	0	0	0	0	1	0	0	0	0	0	0	0	0	0	0	1	3
Lonchocarpus longistylus	0	0	0	0	0	0	0	3	0	0	0	0	0	0	0	0	0	0	0	0	0	0	0
Merremia dissecta	0	0	0	0	0	0	0	0	0	0	0	0	4	0	6	0	3	0	1	4	0	0	1
Operculina pinnatifida	0	1	0	0	0	4	3	2	0	0	0	0	4	0	0	0	1	2	1	0	0	0	0
Opuntia dillenii	0	0	0	12	0	0	0	0	0	0	0	0	0	0	0	0	0	0	0	0	0	0	0
Passiflora foetida	0	0	3	0	0	0	0	0	0	0	0	0	0	0	0	0	0	0	0	0	0	0	0
Piscidia piscipula	0	0	0	0	0	0	0	0	0	3	0	0	0	0	0	6	0	0	0	0	3	0	0
Tecoma stans	0	0	0	0	0	3	0	0	13	0	0	0	0	1	1	0	0	0	0	0	0	0	0

## Sheet: yeast effects
		Host plant species				nectar sample for cell counting method (cells/µL)	nectar sample for HPLC method				nectar sample for agar plate and DNA-sequencing method
						(cells/µL)	(g of solute per 100 mL solution)
Sampling date	Locality	Botanical family	Host plant	Individual	Flower	Yeast cell density	Glucose	Fructose	Sucrose	ID	yeast colony_1	yeast species_1	yeast colony_2	yeast species_2	yeast colony_3	yeast species_3	yeast colony _4	yeast species_4	yeast colony_5	yeast species_5	yeast colony_6	yeast species_6
2009-02-06	Carretera ProgresoTelchac	Agavaceae	Agave angustifolia	1	2	121.429	6.8721	4.63534	7.8869	102	7C-F	Hannaella siamensis	8C-F	Hannaella siamensis	9C-F	Hannaella siamensis
2009-02-06	Carretera ProgresoTelchac	Agavaceae	Agave angustifolia	1	3	68.5714	8.60809	4.88735	13.5465	103
2009-02-06	Carretera ProgresoTelchac	Agavaceae	Agave angustifolia	2	1	0	4.06905	2.12082	7.91772	104
2009-02-06	Carretera ProgresoTelchac	Agavaceae	Agave angustifolia	2	2	0	2.42969	1.34909	5.69053	105
2009-02-06	Carretera ProgresoTelchac	Agavaceae	Agave angustifolia	2	3	0	3.60905	1.90163	5.21127	106
2009-02-16	Carretera ProgresoTelchac	Agavaceae	Agave angustifolia	3	1	15.6522	2.19825	1.6397	1.05624	124
2009-02-16	Carretera ProgresoTelchac	Agavaceae	Agave angustifolia	3	3	153.529				125
2009-02-17	Carretera ProgresoTelchac	Agavaceae	Agave angustifolia	3	4	0	6.79619	5.07274	1.38443	126
2009-02-17	Carretera ProgresoTelchac	Agavaceae	Agave angustifolia	3	5	0	9.60709	7.14522	2.38254	127
2009-02-17	Carretera ProgresoTelchac	Agavaceae	Agave angustifolia	3	6	56.6667	5.8441	4.72203	0.45823	128
2009-02-17	Carretera ProgresoTelchac	Agavaceae	Agave angustifolia	4	1	0	5.00245	3.05759	2.06679	129
2009-02-17	Carretera ProgresoTelchac	Agavaceae	Agave angustifolia	4	2	0	4.58536	3.39056	0.932457	130
2009-02-17	Carretera ProgresoTelchac	Agavaceae	Agave angustifolia	4	3	0	6.44922	4.21707	1.99301	131
2009-02-17	Carretera ProgresoTelchac	Agavaceae	Agave angustifolia	5	1	0	0.520685	0.38412	0.516877	132
2009-02-17	Carretera ProgresoTelchac	Agavaceae	Agave angustifolia	5	2	0	6.45808	5.31058	0.4663	133
2009-02-17	Carretera ProgresoTelchac	Agavaceae	Agave angustifolia	5	3	0	4.86317	3.84652	0.287661	134
2009-02-17	Carretera ProgresoTelchac	Agavaceae	Agave angustifolia	6	1	0	2.58733	1.68545	3.16948	135
2009-02-17	Carretera ProgresoTelchac	Agavaceae	Agave angustifolia	6	2	0	2.95906	1.98747	3.44978	136
2009-02-17	Carretera ProgresoTelchac	Agavaceae	Agave angustifolia	6	3	0	3.83531	2.85115	1.75342	137
2009-02-25	Carretera ProgresoTelchac	Agavaceae	Agave angustifolia	7	1	0	0.256981	0.216566	0.308799	138
2009-02-25	Carretera ProgresoTelchac	Agavaceae	Agave angustifolia	8	1	100	4.39208	2.40148	8.02754	139
2009-02-25	Carretera ProgresoTelchac	Agavaceae	Agave angustifolia	7	2	0	2.72046	1.51013	3.48637	152
2009-02-25	Carretera ProgresoTelchac	Agavaceae	Agave angustifolia	7	3	12.381	8.9594	4.97184	11.4077	153	15C-F	Clavispora lusitaniae	16C-F	Clavispora lusitaniae	17C-F	Clavispora lusitaniae
2009-02-25	Carretera ProgresoTelchac	Agavaceae	Agave angustifolia	7	4	0	3.86504	2.05077	5.38153	154
2009-02-25	Carretera ProgresoTelchac	Agavaceae	Agave angustifolia	8	2	27.0588	4.39807	3.27289	0.75893	155
2009-02-25	Carretera ProgresoTelchac	Agavaceae	Agave angustifolia	8	3	1215	2.15483	2.05189	0.135559	156	18C-F	Clavispora lusitaniae	19C-F	Candida sorbosivorans	20C-F	like Meira
2009-02-25	Carretera ProgresoTelchac	Agavaceae	Agave angustifolia	9	1	0	2.38875	1.27652	3.92946	157
2009-02-25	Carretera ProgresoTelchac	Agavaceae	Agave angustifolia	9	2	0	1.98136	1.08897	3.93291	158
2009-02-25	Carretera ProgresoTelchac	Agavaceae	Agave angustifolia	9	3	0	2.08947	1.1696	2.87216	159
2009-02-25	Carretera ProgresoTelchac	Agavaceae	Agave angustifolia	10	1	0	2.01744	1.05245	3.06826	160
2009-02-25	Carretera ProgresoTelchac	Agavaceae	Agave angustifolia	10	2	0	2.65916	1.431	4.39401	161
2009-02-25	Carretera ProgresoTelchac	Agavaceae	Agave angustifolia	10	3	0	2.02497	1.60443	1.11273	162
2009-02-03	Dzilam de bravo	Acanthaceae	Bravaisia berlandieriana	1	1	0	3.1987	4.47918	6.76601	90
2009-02-03	Dzilam de bravo	Acanthaceae	Bravaisia berlandieriana	1	2	0	4.59506	5.8938	8.78843	91
2009-02-03	Dzilam de bravo	Acanthaceae	Bravaisia berlandieriana	1	3	0	0.862875	1.45813	1.07721	92
2009-02-03	Dzilam de bravo	Acanthaceae	Bravaisia berlandieriana	2	1	0	7.64788	9.53881	19.4851	93
2009-02-03	Dzilam de bravo	Acanthaceae	Bravaisia berlandieriana	2	2	0	4.93523	6.33192	7.60047	94
2009-02-03	Dzilam de bravo	Acanthaceae	Bravaisia berlandieriana	2	3	0	6.61692	8.51986	8.87407	95
2009-02-03	Dzilam de bravo	Acanthaceae	Bravaisia berlandieriana	3	1	0	0.0195621	0.0209796	0.0866774	96
2009-02-03	Dzilam de bravo	Acanthaceae	Bravaisia berlandieriana	3	2	0	1.38171	1.84898	3.01665	97
2009-02-03	Dzilam de bravo	Acanthaceae	Bravaisia berlandieriana	3	3	0	2.21091	3.03154	10.1813	98
2009-02-03	Dzilam de bravo	Acanthaceae	Bravaisia berlandieriana	4	1	0	2.70677	3.75424	9.09157	99
2009-02-03	Dzilam de bravo	Acanthaceae	Bravaisia berlandieriana	5	1	0	5.15314	7.07495	10.6138	100
2009-02-03	Dzilam de bravo	Acanthaceae	Bravaisia berlandieriana	5	2	128.889	3.56952	4.78917	7.18265	101	4C-F	Papiliotrema flavescens	5C-F	Papiliotrema flavescens	6C-F	Papiliotrema flavescens
2009-02-06	Carretera ProgresoTelchac	Acanthaceae	Bravaisia berlandieriana	7	1	0	4.22539	4.90143	9.48546	110
2009-02-06	Carretera ProgresoTelchac	Acanthaceae	Bravaisia berlandieriana	7	2	0	4.69178	5.42261	9.8893	111
2009-02-06	Carretera ProgresoTelchac	Acanthaceae	Bravaisia berlandieriana	7	3	0	3.96178	4.52653	7.44065	112
2009-02-06	Carretera ProgresoTelchac	Acanthaceae	Bravaisia berlandieriana	8	1	0	1.98828	2.43449	5.56915	113
2009-02-06	Carretera ProgresoTelchac	Acanthaceae	Bravaisia berlandieriana	8	2	0	5.81033	6.34775	18.147	114
2009-02-06	Carretera ProgresoTelchac	Acanthaceae	Bravaisia berlandieriana	8	3	0	10.9864	11.9347	7.31264	115
2009-02-06	Carretera ProgresoTelchac	Acanthaceae	Bravaisia berlandieriana	9	1	0	1.76412	2.94902	16.2502	116
2009-02-06	Carretera ProgresoTelchac	Acanthaceae	Bravaisia berlandieriana	9	2	93.3333	1.61348	2.13386	9.82244	117	11C-F	Cryptococcus sp.
2009-02-06	Carretera ProgresoTelchac	Acanthaceae	Bravaisia berlandieriana	9	3	0	1.3714	2.33505	12.6267	118
2009-02-16	Carretera ProgresoTelchac	Acanthaceae	Bravaisia berlandieriana	7	1		5.29324	5.83225	5.66554	122
2009-02-16	Carretera ProgresoTelchac	Acanthaceae	Bravaisia berlandieriana	7	2	0	5.57788	6.61266	3.76289	123
2009-04-20	Uaymitun	Boraginaceae	Cordia sebestena	1	1	0	5.9504	4.98108	4.39507	267
2009-04-20	Uaymitun	Boraginaceae	Cordia sebestena	1	2	0	4.01319	3.53241	6.06642	268
2009-04-20	Uaymitun	Boraginaceae	Cordia sebestena	1	3	0	5.53312	4.93695	5.41562	269
2009-04-20	Uaymitun	Boraginaceae	Cordia sebestena	2	1	0	4.83385	4.21458	4.92737	270
2009-04-20	Uaymitun	Boraginaceae	Cordia sebestena	2	2	0	3.93681	3.60854	4.69468	271
2009-04-20	Uaymitun	Boraginaceae	Cordia sebestena	2	3	55.6522	4.84241	4.18106	4.87493	272
2009-04-20	Uaymitun	Boraginaceae	Cordia sebestena	3	1	0	5.12986	4.76207	5.5506	273
2009-04-20	Uaymitun	Boraginaceae	Cordia sebestena	3	2	30.6667	5.16959	4.54554	6.61083	274
2009-04-20	Uaymitun	Boraginaceae	Cordia sebestena	3	3	0	5.6522	5.11304	5.32782	275
2009-04-20	Uaymitun	Boraginaceae	Cordia sebestena	4	1	367.647	4.53679	4.02261	6.08514	276
2009-04-20	Uaymitun	Boraginaceae	Cordia sebestena	4	2	0	4.07671	3.53518	5.57731	277
2009-04-20	Uaymitun	Boraginaceae	Cordia sebestena	4	3	338.333	4.31934	3.73462	5.5126	278
2009-04-27	Telchac puerto	Boraginaceae	Cordia sebestena	5	1	2310	3.99061	3.62091	5.66712	310
2009-04-27	Telchac puerto	Boraginaceae	Cordia sebestena	5	2	532.308	2.10748	2.13523	2.6679	311
2009-04-27	Telchac puerto	Boraginaceae	Cordia sebestena	5	3	1100	4.48032	4.07737	5.82789	312
2009-04-27	Telchac puerto	Boraginaceae	Cordia sebestena	6	1	4620	4.29062	3.75341	5.68553	313
2009-04-27	Telchac puerto	Boraginaceae	Cordia sebestena	6	2	1760	3.89532	3.39571	5.81873	314	65 C -F	Candida apicola
2009-04-27	Telchac puerto	Boraginaceae	Cordia sebestena	6	3	2420	4.09382	3.59535	6.2402	315
2009-04-20	Uaymitun	Malvaceae	Gossypium hirsutum	1	1	0	8.02841	7.05778	0.53768	254
2009-04-20	Uaymitun	Malvaceae	Gossypium hirsutum	1	2	0	6.13481	5.83784	0.316281	255
2009-04-20	Uaymitun	Malvaceae	Gossypium hirsutum	1	3	0	7.99984	7.38358	0.526383	256
2009-04-20	Uaymitun	Malvaceae	Gossypium hirsutum	2	1	0	9.24639	8.50859	0.549388	257
2009-04-20	Uaymitun	Malvaceae	Gossypium hirsutum	2	2	0	7.06114	6.84243	0.474572	258
2009-04-20	Uaymitun	Malvaceae	Gossypium hirsutum	2	3	0	5.63143	5.61561	0.296478	259
2009-04-20	Uaymitun	Malvaceae	Gossypium hirsutum	3	1	0	9.03797	8.3692	0.543271	260
2009-04-20	Uaymitun	Malvaceae	Gossypium hirsutum	3	2	0	8.17657	7.57372	0.441687	261
2009-04-20	Uaymitun	Malvaceae	Gossypium hirsutum	3	3	0	10.5008	9.6781	0.578568	262
2009-04-27	Telchac puerto	Malvaceae	Gossypium hirsutum	4	1	832	5.40587	5.24068	0.321924	304	53C-F-1	Vishniacozyma taibaiensis
2009-04-27	Telchac puerto	Malvaceae	Gossypium hirsutum	4	2	98.4615	4.83546	4.79895	0.254748	305	61 C -F	Candida versatilis
2009-04-27	Telchac puerto	Malvaceae	Gossypium hirsutum	4	3	20	9.32228	8.49924	0.599476	306
2009-04-27	Telchac puerto	Malvaceae	Gossypium hirsutum	5	1	98.4615	7.1534	6.91067	0.386631	307	63 C -F	Sympodiomycopsis paphiopedili
2009-04-27	Telchac puerto	Malvaceae	Gossypium hirsutum	5	2	39097.8	6.68637	6.53328	0.256528	308	55C-F	Starmerella bombicola
2009-04-27	Telchac puerto	Malvaceae	Gossypium hirsutum	5	3	60	5.88172	5.69703	0.310723	309
2009-05-13	Telchac puerto	Malvaceae	Gossypium hirsutum	6	1	0	8.78103	8.13901	0.589596	316
2009-05-13	Telchac puerto	Malvaceae	Gossypium hirsutum	6	2	0	4.80216	4.54956	0.268017	317
2009-05-13	Telchac puerto	Malvaceae	Gossypium hirsutum	6	3	147.619	11.4184	10.937	0.551887	318
2009-05-13	Telchac puerto	Malvaceae	Gossypium hirsutum	7	1	162.105	9.58124	8.81751	0.607862	319
2009-05-13	Telchac puerto	Malvaceae	Gossypium hirsutum	7	2	0	5.54907	5.11805	0.400503	320
2009-03-19	CCBA-UADY-Xmatkuil	Polygonaceae	Gymnopodium floribundum	1	1	15	0.599732	2.17861	0.0588907	210
2009-03-19	CCBA-UADY-Xmatkuil	Polygonaceae	Gymnopodium floribundum	1	2	0	3.77103	7.74299	0.618935	211
2009-03-19	CCBA-UADY-Xmatkuil	Polygonaceae	Gymnopodium floribundum	1	3	0	4.04128	8.06573	0.735925	212
2009-03-19	CCBA-UADY-Xmatkuil	Polygonaceae	Gymnopodium floribundum	1	4	0	3.42005	6.93064	0.45441	213
2009-03-19	CCBA-UADY-Xmatkuil	Polygonaceae	Gymnopodium floribundum	1	5	0	1.23815	5.91525	0.346652	214
2009-03-19	CCBA-UADY-Xmatkuil	Polygonaceae	Gymnopodium floribundum	1	6	76.6667	2.24885	6.62129	0.42974	215
2009-03-19	CCBA-UADY-Xmatkuil	Polygonaceae	Gymnopodium floribundum	2	1	16.6667	0.930869	3.67569	0.354206	216
2009-03-19	CCBA-UADY-Xmatkuil	Polygonaceae	Gymnopodium floribundum	2	2	139.5	0.634645	3.36679	0.228813	217
2009-03-19	CCBA-UADY-Xmatkuil	Polygonaceae	Gymnopodium floribundum	2	3	62.2222	1.45863	7.00555	0.511153	218
2009-03-19	CCBA-UADY-Xmatkuil	Polygonaceae	Gymnopodium floribundum	2	4	135	1.07634	4.96726	0.365339	219
2009-03-20	CCBA-UADY-Xmatkuil	Polygonaceae	Gymnopodium floribundum	3	1	2687.5	0.537796	3.00557	0.297598	220
2009-03-20	CCBA-UADY-Xmatkuil	Polygonaceae	Gymnopodium floribundum	3	2	900	1.42348	5.46471	0.700542	221
2009-03-20	CCBA-UADY-Xmatkuil	Polygonaceae	Gymnopodium floribundum	3	3	0				222
2009-03-20	CCBA-UADY-Xmatkuil	Polygonaceae	Gymnopodium floribundum	4	1	235.714	0.0117435	0.886916	0.0646491	223
2009-03-20	CCBA-UADY-Xmatkuil	Polygonaceae	Gymnopodium floribundum	4	2	48	0.538339	1.75144	0.0611739	224
2009-03-20	CCBA-UADY-Xmatkuil	Polygonaceae	Gymnopodium floribundum	4	4	326.667	0.814226	2.42004	0.0550278	225	39C-F	Cryptococcus sp.	40C-F	Cryptococcus laurentii var. laurentii	41C-F	Candida sorbosivorans
2009-03-20	CCBA-UADY-Xmatkuil	Polygonaceae	Gymnopodium floribundum	4	3	0	1.18591	2.93952	0.170598	226
2009-04-23	CCBA-UADY-Xmatkuil	Polygonaceae	Gymnopodium floribundum	5	1	40	1.49971	3.11424	0.0605585	279
2009-04-23	CCBA-UADY-Xmatkuil	Polygonaceae	Gymnopodium floribundum	5	2	108.333	1.96336	3.37918	0.197342	280
2009-04-23	CCBA-UADY-Xmatkuil	Polygonaceae	Gymnopodium floribundum	5	3	101.25	1.42161	2.49942	0.227004	281
2009-04-23	CCBA-UADY-Xmatkuil	Polygonaceae	Gymnopodium floribundum	5	4	70	1.08979	1.89403	0.141964	282
2009-04-23	CCBA-UADY-Xmatkuil	Polygonaceae	Gymnopodium floribundum	6	1	15.625	1.02635	2.5637	0.15417	283
2009-04-23	CCBA-UADY-Xmatkuil	Polygonaceae	Gymnopodium floribundum	6	2	43.125	1.33427	2.15321	0.0614324	284
2009-04-23	CCBA-UADY-Xmatkuil	Polygonaceae	Gymnopodium floribundum	6	3	0	1.34447	2.26029	0.0303285	285
2008-11-07	San Pedro Chacabal	Convolvulaceae	Ipomoea crinicalyx	1	1	0	6.38723	6.39085	27.7796	63
2008-11-07	San Pedro Chacabal	Convolvulaceae	Ipomoea crinicalyx	1	2	63.3333	6.69274	6.74228	26.468	64
2008-11-07	San Pedro Chacabal	Convolvulaceae	Ipomoea crinicalyx	1	3	0	5.4774	5.36015	23.5522	65
2008-11-07	San Pedro Chacabal	Convolvulaceae	Ipomoea crinicalyx	2	1	0	1.79802	1.85026	7.86588	66
2008-11-07	San Pedro Chacabal	Convolvulaceae	Ipomoea crinicalyx	2	2	533.333	5.46929	5.03238	18.1155	67
2008-11-07	San Pedro Chacabal	Convolvulaceae	Ipomoea crinicalyx	2	3	0	5.01992	4.99698	23.615	68
2009-11-09	PotrerosUADY	Convolvulaceae	Ipomoea crinicalyx	1	1	14000	1.50748	1.58411	4.58169	514
2009-11-09	PotrerosUADY	Convolvulaceae	Ipomoea crinicalyx	1	2	1728	0.916539	0.84872	4.45959	515	292 C - F	Starmerella sp.
2009-11-09	PotrerosUADY	Convolvulaceae	Ipomoea crinicalyx	1	3	12616.2	0.95094	0.833119	4.62208	516	337 C - F	Starmerella sp.
2009-11-09	PotrerosUADY	Convolvulaceae	Ipomoea crinicalyx	1	4	7286.15	2.65435	2.28676	10.6401	517
2009-11-09	PotrerosUADY	Convolvulaceae	Ipomoea crinicalyx	2	1	5632	4.55274	5.03154	23.0652	518	295 C - F	Metschnikowia ipomoeae
2009-11-09	PotrerosUADY	Convolvulaceae	Ipomoea crinicalyx	2	2	2104.38	2.89926	3.03053	11.7867	519	298 C - F	Metschnikowia ipomoeae
2009-11-09	PotrerosUADY	Convolvulaceae	Ipomoea crinicalyx	2	3	3257.14	2.25787	2.09511	12.2724	520	301 C - F	Metschnikowia lochheadii
2009-11-09	PotrerosUADY	Convolvulaceae	Ipomoea crinicalyx	2	4	2720	3.27732	3.5789	15.579	521	303 C - F	Candida powellii
2009-11-09	PotrerosUADY	Convolvulaceae	Ipomoea crinicalyx	3	1	76800	5.92629	6.13393	13.6202	522	304 C - F	Metschnikowia ipomoeae
2009-11-09	PotrerosUADY	Convolvulaceae	Ipomoea crinicalyx	3	2	57600				523
2009-11-09	PotrerosUADY	Convolvulaceae	Ipomoea crinicalyx	3	3	13440				524	306 C - F	Metschnikowia ipomoeae
2009-11-09	PotrerosUADY	Convolvulaceae	Ipomoea crinicalyx	4	1	1824.64	3.68667	3.25979	18.2848	525	341 C - F	Wickerhamiella occidentalis
2009-11-09	PotrerosUADY	Convolvulaceae	Ipomoea crinicalyx	4	2	150	3.10795	2.76157	17.2982	526	310 C - F	Metschnikowia sp.
2009-11-09	PotrerosUADY	Convolvulaceae	Ipomoea crinicalyx	4	3	5485.71	1.74791	1.46343	8.91215	527	313 C - F	Candida etchellsii
2009-11-09	PotrerosUADY	Convolvulaceae	Ipomoea crinicalyx	4	4	2250	3.06898	2.52069	14.3288	528	315 C - F	Metschnikowia ipomoeae
2009-11-09	PotrerosUADY	Convolvulaceae	Ipomoea crinicalyx	5	1	11177.8	3.76307	3.32403	18.8508	529	318 C - F	Metschnikowia ipomoeae
2009-11-09	PotrerosUADY	Convolvulaceae	Ipomoea crinicalyx	5	2	827.586	4.07613	3.65573	14.6884	530	319 C - F	Metschnikowia lochheadii
2009-11-09	PotrerosUADY	Convolvulaceae	Ipomoea crinicalyx	5	3	3520	4.37135	3.59908	17.4239	531	320 C - F	Metschnikowia ipomoeae
2009-11-09	PotrerosUADY	Convolvulaceae	Ipomoea crinicalyx	5	4	2320	3.13902	2.16808	17.718	532	321 C - F	Metschnikowia ipomoeae
2009-10-26	Entrada a Xcuyun	Convolvulaceae	Ipomoea hederifolia	1	1	400	0.228261	3.61803	13.0821	473	222 C - F	Ustilago sparsa
2009-10-26	Entrada a Xcuyun	Convolvulaceae	Ipomoea hederifolia	1	2	0	0.144412	3.25936	13.4409	474	325 C - F	Sympodiomycopsis paphiopedili
2009-10-26	Entrada a Xcuyun	Convolvulaceae	Ipomoea hederifolia	1	3	0	0.324536	8.93849	31.6881	475
2009-10-26	Entrada a Xcuyun	Convolvulaceae	Ipomoea hederifolia	2	1	1318.33	0.214082	3.33482	19.6836	476	225 C - F	Cryptococcus laurentii var. laurentii	227 C - F	Cryptococcus laurentii var. laurentii
2009-10-26	Entrada a Xcuyun	Convolvulaceae	Ipomoea hederifolia	2	2	5300	1.67533	7.14451	30.9752	477	228 C - F	Ustilago sp.
2009-10-26	Entrada a Xcuyun	Convolvulaceae	Ipomoea hederifolia	3	1	0	0.241696	5.21002	23.751	478
2009-10-26	Entrada a Xcuyun	Convolvulaceae	Ipomoea hederifolia	3	2	54.8276	0.214121	2.70722	12.8875	479	227C-F	Cryptococcus laurentii var. laurentii
2009-10-26	Entrada a Xcuyun	Convolvulaceae	Ipomoea hederifolia	3	3	21.1538	0.357331	3.4106	16.8869	480	231 C - F	Ustilago sparsa
2009-10-26	Entrada a Xcuyun	Convolvulaceae	Ipomoea hederifolia	4	1	0	0.169404	3.63641	11.4948	481	234 C - F	Ustilago sparsa
2009-10-26	Entrada a Xcuyun	Convolvulaceae	Ipomoea hederifolia	4	2	1920	0.0892474	3.6896	12.4984	482	237 C - F	Sympodiomycopsis paphiopedili
2009-10-26	Entrada a Xcuyun	Convolvulaceae	Ipomoea hederifolia	4	3	6620.69	0.137695	2.3257	8.39421	483	240 C - F	Ustilago sp.
2009-10-26	Entrada a Xcuyun	Convolvulaceae	Ipomoea hederifolia	5	1	6400	0.115387	4.28477	13.7559	484
2009-10-26	Entrada a Xcuyun	Convolvulaceae	Ipomoea hederifolia	5	2	800	0.097609	4.61373	14.2384	485	327 C - F
2009-10-27	Entrada a Xcuyun	Convolvulaceae	Ipomoea hederifolia	6	1	7680	0.210421	2.26209	9.10745	486
2009-10-27	Entrada a Xcuyun	Convolvulaceae	Ipomoea hederifolia	6	2	132.414	0.218457	2.63682	11.2444	487	264 C - F	Hannaella sinensis
2009-10-27	Entrada a Xcuyun	Convolvulaceae	Ipomoea hederifolia	6	3	25.7812	0.136563	4.12192	13.3286	488	330 C - F
2009-10-27	Entrada a Xcuyun	Convolvulaceae	Ipomoea hederifolia	7	1	1371.85	0.132452	4.50382	13.4466	489	243 C - F	Cryptococcus laurentii var. laurentii
2009-10-27	Entrada a Xcuyun	Convolvulaceae	Ipomoea hederifolia	7	2	0	0.144738	4.40998	11.843	490	246 C - F	Ustilago sp.
2009-10-27	Entrada a Xcuyun	Convolvulaceae	Ipomoea hederifolia	7	3	0	0.204206	4.56258	16.9989	491	249 C - F	Pseudozyma sp.
2009-10-27	Entrada a Xcuyun	Convolvulaceae	Ipomoea hederifolia	8	1	563.636	0.1596	3.54408	15.3364	492	253 C - F	Ustilago sp.
2009-10-27	Entrada a Xcuyun	Convolvulaceae	Ipomoea hederifolia	8	2	341.333	0.15839	3.47864	15.8081	493	272 C - F	Ustilago sparsa
2009-10-27	Entrada a Xcuyun	Convolvulaceae	Ipomoea hederifolia	8	3	1080	0.206357	4.04084	21.2429	494	256 C - F	Ustilago sparsa
2008-10-28	Carretera MéridaProgreso	Convolvulaceae	Ipomoea nil	1	1	11.0345	1.17685	3.92711	22.565	5
2008-10-28	Carretera MéridaProgreso	Convolvulaceae	Ipomoea nil	1	2	0	1.52115	5.2798	25.3325	6
2008-10-28	Carretera MéridaProgreso	Convolvulaceae	Ipomoea nil	2	1	0	1.42244	4.04893	24.0795	7
2008-10-28	Carretera MéridaProgreso	Convolvulaceae	Ipomoea nil	2	2	0	1.58619	4.20913	21.2456	8
2008-10-28	Carretera MéridaProgreso	Convolvulaceae	Ipomoea nil	2	3	0	1.26584	3.52511	17.6418	9
2008-10-28	Carretera MéridaProgreso	Convolvulaceae	Ipomoea nil	3	1	0	0.837519	3.85658	28.35	10
2008-10-28	Carretera MéridaProgreso	Convolvulaceae	Ipomoea nil	3	2	0	1.19646	4.60171	30.5584	11
2008-11-04	Conkal	Convolvulaceae	Ipomoea nil	4	1	800	1.85235	6.38308	22.0526	21
2008-11-04	Conkal	Convolvulaceae	Ipomoea nil	4	2	195	0.946033	1.98759	12.2006	22
2008-11-04	Conkal	Convolvulaceae	Ipomoea nil	4	3	145	1.54814	4.25347	21.1572	23
2008-11-04	Conkal	Convolvulaceae	Ipomoea nil	5	1	0	0.502046	1.75514	21.9377	24
2008-11-04	Conkal	Convolvulaceae	Ipomoea nil	5	2	42.6667	0.466559	1.24061	17.6613	25
2008-11-04	Conkal	Convolvulaceae	Ipomoea nil	5	3	0	0.523997	1.94067	21.4025	26
2008-11-07	San Pedro Chacabal	Convolvulaceae	Ipomoea nil	6	1	0	1.62989	3.96444	35.7121	49
2008-11-07	San Pedro Chacabal	Convolvulaceae	Ipomoea nil	6	2	0	1.09015	2.70409	31.5936	50
2008-11-07	San Pedro Chacabal	Convolvulaceae	Ipomoea nil	6	3	0	1.08445	2.63448	27.0834	51
2008-11-07	San Pedro Chacabal	Convolvulaceae	Ipomoea nil	7	1	0	0.919545	2.5775	24.3873	52
2008-11-07	San Pedro Chacabal	Convolvulaceae	Ipomoea nil	7	2	0	0.967287	2.77768	28.6153	53
2008-11-07	San Pedro Chacabal	Convolvulaceae	Ipomoea nil	7	3	0	0.811844	2.63677	32.3851	54
2009-10-05	Periférico sur, entronque X' matkuil (Atención a victimas)	Convolvulaceae	Ipomoea nil	1	1	47542.9	0.62111	2.50582	21.7269	434
2009-10-05	Periférico sur, entronque X' matkuil (Atención a victimas)	Convolvulaceae	Ipomoea nil	1	2	100800	1.12796	4.16182	21.3064	435
2009-10-05	Periférico sur, entronque X' matkuil (Atención a victimas)	Convolvulaceae	Ipomoea nil	1	3	38976	0.295643	2.20393	19.0252	436
2009-10-06	Periférico sur, entronque X' matkuil (Atención a victimas)	Convolvulaceae	Ipomoea nil	2	1	4985.81	0.526712	0.576213	0.593861	437	180 C - F	Ustilago sp.
2009-10-06	Periférico sur, entronque X' matkuil (Atención a victimas)	Convolvulaceae	Ipomoea nil	2	2	7370.32	0.0828792	0.102438	0.069072	438	182 C - F	Wickerhamiella occidentalis
2009-10-06	Periférico sur, entronque X' matkuil (Atención a victimas)	Convolvulaceae	Ipomoea nil	2	3	5040	0.246233	0.521807	1.99102	439	201 C - F	Sporidiobolus ruineniae
2009-10-07	Periférico sur, entronque X' matkuil (Atención a victimas)	Convolvulaceae	Ipomoea nil	3	1	4830	1.07227	3.13138	14.1818	440
2009-10-07	Periférico sur, entronque X' matkuil (Atención a victimas)	Convolvulaceae	Ipomoea nil	3	2	255360	0.767779	2.23019	10.2757	441
2009-10-07	Periférico sur, entronque X' matkuil (Atención a victimas)	Convolvulaceae	Ipomoea nil	3	3	23520	0.520437	1.45587	7.43571	442
2009-10-07	Periférico sur, entronque X' matkuil (Atención a victimas)	Convolvulaceae	Ipomoea nil	4	1	516.923	0.832252	2.59418	13.3429	443
2009-10-07	Periférico sur, entronque X' matkuil (Atención a victimas)	Convolvulaceae	Ipomoea nil	4	2	1050	0.901006	2.78528	15.3476	444	217 C - F	Cryptococcus sp.
2009-10-07	Periférico sur, entronque X' matkuil (Atención a victimas)	Convolvulaceae	Ipomoea nil	4	3	0	1.1642	3.14968	17.5953	445	218 C - F	Sympodiomycopsis paphiopedili
2009-10-07	Periférico sur, entronque X' matkuil (Atención a victimas)	Convolvulaceae	Ipomoea nil	5	1	157920	1.3463	3.28186	15.8056	446
2009-10-07	Periférico sur, entronque X' matkuil (Atención a victimas)	Convolvulaceae	Ipomoea nil	5	2	19549.1	2.40755	4.8883	21.2317	447
2009-10-07	Periférico sur, entronque X' matkuil (Atención a victimas)	Convolvulaceae	Ipomoea nil	5	3	3990	2.37048	4.50253	17.7589	448
2009-10-07	Periférico sur, entronque X' matkuil (Atención a victimas)	Convolvulaceae	Ipomoea nil	6	1	1890	1.42746	3.27171	18.7697	449	207 C - F	Saitozyma flava
2009-10-07	Periférico sur, entronque X' matkuil (Atención a victimas)	Convolvulaceae	Ipomoea nil	6	2	420	0.655526	3.01257	13.716	450
2009-10-07	Periférico sur, entronque X' matkuil (Atención a victimas)	Convolvulaceae	Ipomoea nil	6	3	40333.3	0.273808	1.35384	14.7924	451
2009-10-07	Periférico sur, entronque X' matkuil (Atención a victimas)	Convolvulaceae	Ipomoea nil	7	1	17600	1.32293	3.65283	18.0992	452
2009-10-07	Periférico sur, entronque X' matkuil (Atención a victimas)	Convolvulaceae	Ipomoea nil	7	2	28600	0.653509	1.86017	16.0748	453
2009-10-07	Periférico sur, entronque X' matkuil (Atención a victimas)	Convolvulaceae	Ipomoea nil	7	3	6160	5.5169	8.51698	7.28429	454
2009-11-02	Entrada a Xcuyun	Convolvulaceae	Ipomoea triloba	1	1	16640	0.322054	4.19468	10.3314	495
2009-11-02	Entrada a Xcuyun	Convolvulaceae	Ipomoea triloba	1	2	0				496
2009-11-02	Entrada a Xcuyun	Convolvulaceae	Ipomoea triloba	1	3	15300	4.44149	10.6943	0	497
2009-11-02	Entrada a Xcuyun	Convolvulaceae	Ipomoea triloba	1	4	5005	0.135213	0.845896	1.30539	498
2009-11-02	Entrada a Xcuyun	Convolvulaceae	Ipomoea triloba	2	1	0				499
2009-11-02	Entrada a Xcuyun	Convolvulaceae	Ipomoea triloba	2	2	0	1.00178	4.81479	23.2018	500	345 C - F
2009-11-02	Entrada a Xcuyun	Convolvulaceae	Ipomoea triloba	2	3	24640				501
2009-11-02	Entrada a Xcuyun	Convolvulaceae	Ipomoea triloba	3	1	0	0.998802	7.78671	27.4367	502
2009-11-02	Entrada a Xcuyun	Convolvulaceae	Ipomoea triloba	3	2	1035.29	0.219966	5.59518	25.0369	503
2009-11-02	Entrada a Xcuyun	Convolvulaceae	Ipomoea triloba	3	3	3520	0.18932	3.95223	19.472	504	277 C - F	Ustilago sp.
2009-11-02	Entrada a Xcuyun	Convolvulaceae	Ipomoea triloba	4	1	502.857	0.948911	2.90262	7.39326	505
2009-11-02	Entrada a Xcuyun	Convolvulaceae	Ipomoea triloba	4	2	2346.67	0.395649	1.75066	2.26935	506
2009-11-02	Entrada a Xcuyun	Convolvulaceae	Ipomoea triloba	4	3	28160				507
2009-11-02	Entrada a Xcuyun	Convolvulaceae	Ipomoea triloba	5	1	3520	0.819168	4.46724	18.7647	508	280 C - F	Saitozyma flava
2009-11-02	Entrada a Xcuyun	Convolvulaceae	Ipomoea triloba	5	2	3080	0.543185	6.87152	37.2033	509
2009-11-02	Entrada a Xcuyun	Convolvulaceae	Ipomoea triloba	5	3	0	0.661036	5.29292	30.0843	510
2009-11-02	Entrada a Xcuyun	Convolvulaceae	Ipomoea triloba	6	1	7040	0.242949	0.844697	1.72266	511	323 C - F	Ustilago sp.	336 C - F
2009-11-02	Entrada a Xcuyun	Convolvulaceae	Ipomoea triloba	6	2	14080	0.644108	2.56802	10.6407	512	283 C - F	Ustilago sp.
2009-11-02	Entrada a Xcuyun	Convolvulaceae	Ipomoea triloba	6	3	17600	0.721053	6.14449	32.9294	513	286 C - F	Pseudozyma sp.
2008-10-27	J Bot Cicy	Fabaceae	Lonchocarpus longistylus	1	1	0	5.04412	4.49063	18.2534	1
2008-10-27	J Bot Cicy	Fabaceae	Lonchocarpus longistylus	1	2	0	5.14763	4.33863	13.6183	2
2008-10-27	J Bot Cicy	Fabaceae	Lonchocarpus longistylus	1	3	0	9.77804	8.83947	13.317	3
2008-10-27	J Bot Cicy	Fabaceae	Lonchocarpus longistylus	1	4	0	4.15269	3.6574	14.1453	4
2008-10-28	Cicy	Fabaceae	Lonchocarpus longistylus	2	1	0	13.7153	12.8914	16.1761	17
2008-10-28	Cicy	Fabaceae	Lonchocarpus longistylus	2	2	0	5.56955	4.9924	39.3475	18
2008-10-28	Cicy	Fabaceae	Lonchocarpus longistylus	2	3	0	15.6655	14.3896	21.2035	19
2008-10-28	Cicy	Fabaceae	Lonchocarpus longistylus	2	4	0	14.0885	13.1639	24.0757	20
2008-11-04	Ucí	Fabaceae	Lonchocarpus longistylus	3	1	0	6.76732	5.58784	30.8742	33
2008-11-04	Ucí	Fabaceae	Lonchocarpus longistylus	3	3	0	6.19554	5.14728	25.4211	34
2008-11-04	Ucí	Fabaceae	Lonchocarpus longistylus	3	2	0	5.6935	4.73736	26.001	35
2008-11-04	Ucí	Fabaceae	Lonchocarpus longistylus	3	4	25.2	4.06523	3.15433	27.2442	36
2008-11-04	Ucí	Fabaceae	Lonchocarpus longistylus	4	1	0	1.59569	1.26124	16.1692	37
2008-11-04	Ucí	Fabaceae	Lonchocarpus longistylus	5	1	0	4.24471	3.44607	34.6013	38
2008-11-04	Ucí	Fabaceae	Lonchocarpus longistylus	5	2	0	5.85685	4.64169	39.3897	39
2008-11-04	Ucí	Fabaceae	Lonchocarpus longistylus	5	3	0	7.0073	5.08171	29.2038	40
2008-11-04	Ucí	Fabaceae	Lonchocarpus longistylus	5	4	0	4.04247	3.38107	26.4747	41
2008-11-04	Ucí	Fabaceae	Lonchocarpus longistylus	6	1	0	3.57015	2.27255	35.6949	42
2008-11-04	Conkal	Fabaceae	Lonchocarpus longistylus	7	1	0	5.75862	3.87815	41.1286	43
2008-11-04	Conkal	Fabaceae	Lonchocarpus longistylus	7	3	0	5.86562	4.13811	14.6419	44
2008-11-04	Conkal	Fabaceae	Lonchocarpus longistylus	7	2	3300	4.3276	3.09114	11.3015	45
2008-11-04	Conkal	Fabaceae	Lonchocarpus longistylus	7	4	98.4615	4.78283	3.72691	18.0852	46
2008-11-04	Conkal	Fabaceae	Lonchocarpus longistylus	7	2	19801.1	2.00749	1.07191	17.5135	47	1 C -F	Metschnikowia sp.	2 C -F	Metschnikowia sp.	3 C -F	Metschnikowia sp.
2008-11-04	Conkal	Fabaceae	Lonchocarpus longistylus	8	1	1157.14	3.7355	2.75173	11.9056	48
2009-02-06	Carretera ProgresoTelchac	Malvaceae	Malvaviscus arboreus	1	1	0	2.27132	6.79273	12.8646	107
2009-02-06	Carretera ProgresoTelchac	Malvaceae	Malvaviscus arboreus	1	2	12.8	1.24259	4.4932	11.0823	108
2009-02-06	Carretera ProgresoTelchac	Malvaceae	Malvaviscus arboreus	1	3	0	1.23878	7.92163	19.5569	109
2009-02-25	Carretera ProgresoTelchac	Malvaceae	Malvaviscus arboreus	2	1	0	2.94194	7.10206	9.41134	149
2009-02-25	Carretera ProgresoTelchac	Malvaceae	Malvaviscus arboreus	2	2	0	7.07865	13.514	19.7161	150
2009-02-25	Carretera ProgresoTelchac	Malvaceae	Malvaviscus arboreus	2	3	0	3.40563	8.64728	11.7173	151
2009-04-27	Telchac puerto	Malvaceae	Malvaviscus arboreus	3	1	3515	2.11208	6.09121	10.1063	286
2009-04-27	Telchac puerto	Malvaceae	Malvaviscus arboreus	3	2	458.182	3.58803	7.74247	12.365	287
2009-04-27	Telchac puerto	Malvaceae	Malvaviscus arboreus	4	1	193.333	0.725226	3.91501	5.12572	288
2009-04-27	Telchac puerto	Malvaceae	Malvaviscus arboreus	4	2	2849.05	0.805212	6.79772	11.4102	289
2009-04-27	Telchac puerto	Malvaceae	Malvaviscus arboreus	5	1	492.857	1.04562	5.85556	16.7479	290
2009-04-27	Telchac puerto	Malvaceae	Malvaviscus arboreus	5	2	293.333	1.51393	5.48794	12.1574	291
2009-04-27	Telchac puerto	Malvaceae	Malvaviscus arboreus	5	3	342.857	2.14693	7.51452	14.5585	292
2009-04-27	Telchac puerto	Malvaceae	Malvaviscus arboreus	6	1	21183.3	1.7639	4.18484	6.39977	293
2009-04-27	Telchac puerto	Malvaceae	Malvaviscus arboreus	6	2	1920	3.12259	8.60825	12.8652	294
2009-04-27	Telchac puerto	Malvaceae	Malvaviscus arboreus	6	3	1706.67	2.80275	7.99904	10.6271	295
2009-04-27	Telchac puerto	Malvaceae	Malvaviscus arboreus	7	1	1192.73	3.18202	6.87115	12.7993	296
2009-04-27	Telchac puerto	Malvaceae	Malvaviscus arboreus	7	2	1350	3.53701	7.30875	11.8556	297
2009-04-27	Telchac puerto	Malvaceae	Malvaviscus arboreus	8	1	566.154	2.59978	7.5314	9.50611	298
2009-04-27	Telchac puerto	Malvaceae	Malvaviscus arboreus	8	2	7000	2.37656	6.76616	7.49415	299
2009-04-27	Telchac puerto	Malvaceae	Malvaviscus arboreus	9	1	0	4.00473	6.75549	12.394	300
2009-04-27	Telchac puerto	Malvaceae	Malvaviscus arboreus	9	2	213.333	5.06932	8.12165	12.5861	301	58 C -F	Candida versatilis	59 C -F
2009-04-27	Telchac puerto	Malvaceae	Malvaviscus arboreus	9	3	0	3.87593	7.42735	12.8828	302
2009-04-27	Telchac puerto	Malvaceae	Malvaviscus arboreus	9	4	106.667	3.0494	6.20074	9.78947	303
2008-10-28	Carretera MéridaProgreso	Convolvulaceae	Merremia aegyptia	1	1	14.2105	9.63601	9.62118	13.1962	12
2008-10-28	Carretera MéridaProgreso	Convolvulaceae	Merremia aegyptia	1	2	0	10.8872	11.204	12.8267	13
2008-10-28	Carretera MéridaProgreso	Convolvulaceae	Merremia aegyptia	2	1	0	11.9325	11.8757	17.7887	14
2008-10-28	Carretera MéridaProgreso	Convolvulaceae	Merremia aegyptia	2	2	0	17.5405	17.6908	9.71997	15
2008-10-28	Carretera MéridaProgreso	Convolvulaceae	Merremia aegyptia	2	3	0	7.5431	7.55852	10.9418	16
2008-11-04	Conkal	Convolvulaceae	Merremia aegyptia	3	1	0	10.3636	10.5601	5.01382	27
2008-11-04	Conkal	Convolvulaceae	Merremia aegyptia	3	2	0	10.7322	11.2354	10.6003	28
2008-11-04	Conkal	Convolvulaceae	Merremia aegyptia	3	3		5.73231	6.11948	3.00074	29
2008-11-04	Conkal	Convolvulaceae	Merremia aegyptia	4	1	0	11.7813	11.6728	10.0772	30
2008-11-04	Conkal	Convolvulaceae	Merremia aegyptia	4	2	0	6.25364	6.36396	12.8266	31
2008-11-04	Conkal	Convolvulaceae	Merremia aegyptia	4	3	24.6154	6.6393	6.88811	14.4159	32
2008-11-07	San Pedro Chacabal	Convolvulaceae	Merremia aegyptia	5	1	0	16.4204	15.9214	13.4742	55
2008-11-07	San Pedro Chacabal	Convolvulaceae	Merremia aegyptia	5	2	0	11.6159	11.1012	11.3775	56
2008-11-07	San Pedro Chacabal	Convolvulaceae	Merremia aegyptia	5	3	0	8.67455	8.32571	8.53391	57
2008-11-07	San Pedro Chacabal	Convolvulaceae	Merremia aegyptia	6	1	0	6.31461	6.7694	10.3036	58
2008-11-07	San Pedro Chacabal	Convolvulaceae	Merremia aegyptia	6	2	0	7.972	7.88079	15.6276	59
2008-11-07	San Pedro Chacabal	Convolvulaceae	Merremia aegyptia	6	3	50.9091	6.26338	6.54585	8.66042	60
2008-11-07	San Pedro Chacabal	Convolvulaceae	Merremia aegyptia	7	1	0	9.84529	9.83002	19.7142	61
2008-11-07	San Pedro Chacabal	Convolvulaceae	Merremia aegyptia	7	2	32	8.8025	8.95476	16.9064	62
2009-10-12	Carretera MéridaMotul entrada a Xcuyun	Convolvulaceae	Merremia aegyptia	1	1	15232	0.132871	0.143704	0.243059	455	208 C - F	Papilotrema nemorosus	212 C - F
2009-10-12	Carretera MéridaMotul entrada a Xcuyun	Convolvulaceae	Merremia aegyptia	1	2	0	10.2429	9.68522	5.94895	456
2009-10-12	Carretera MéridaMotul entrada a Xcuyun	Convolvulaceae	Merremia aegyptia	1	3	280	9.29596	9.63382	5.75147	457	209 C - F	Sympodiomycopsis paphiopedili
2009-10-12	Carretera MéridaMotul entrada a Xcuyun	Convolvulaceae	Merremia aegyptia	2	1	695.172	8.38799	8.39812	18.2069	458
2009-10-12	Carretera MéridaMotul entrada a Xcuyun	Convolvulaceae	Merremia aegyptia	2	2	61226.7	0.562012	0.573675	1.17804	459	213 C - F	uncultured fungus	221 C - F	Aureobasidium sp.
2009-10-12	Carretera MéridaMotul entrada a Xcuyun	Convolvulaceae	Merremia aegyptia	2	3	224	10.1371	9.8972	12.4197	460	210 C - F	Priceomyces melissophilus
2009-10-12	Carretera MéridaMotul entrada a Xcuyun	Convolvulaceae	Merremia aegyptia	3	1	2749.09	6.95913	6.77316	12.5681	461
2009-10-12	Carretera MéridaMotul entrada a Xcuyun	Convolvulaceae	Merremia aegyptia	3	2	433.548	7.18624	6.85715	6.4218	462
2009-10-12	Carretera MéridaMotul entrada a Xcuyun	Convolvulaceae	Merremia aegyptia	3	3	2337.39	7.04175	7.0123	18.822	463
2009-10-12	Carretera MéridaMotul entrada a Xcuyun	Convolvulaceae	Merremia aegyptia	4	1	0	5.73183	5.71297	2.98707	464
2009-10-12	Carretera MéridaMotul entrada a Xcuyun	Convolvulaceae	Merremia aegyptia	4	2	420	6.09437	5.89658	3.19945	465
2009-10-12	Carretera MéridaMotul entrada a Xcuyun	Convolvulaceae	Merremia aegyptia	4	3	210	0.00293199	0.0181615	0.0254748	466
2009-10-12	Carretera MéridaMotul entrada a Xcuyun	Convolvulaceae	Merremia aegyptia	5	1	210	8.51218	8.0977	6.46919	467
2009-10-12	Carretera MéridaMotul entrada a Xcuyun	Convolvulaceae	Merremia aegyptia	5	2	516.923	6.99532	6.70371	10.0569	468
2009-10-12	Carretera MéridaMotul entrada a Xcuyun	Convolvulaceae	Merremia aegyptia	5	3	1792	4.21618	4.27298	3.90462	469
2009-10-12	Carretera MéridaMotul entrada a Xcuyun	Convolvulaceae	Merremia aegyptia	6	1	3840	5.87252	5.92858	4.38732	470
2009-10-12	Carretera MéridaMotul entrada a Xcuyun	Convolvulaceae	Merremia aegyptia	6	2	2384.52	3.82917	3.71049	3.17326	471
2009-10-12	Carretera MéridaMotul entrada a Xcuyun	Convolvulaceae	Merremia aegyptia	6	3	231.724	5.48454	5.34288	8.11359	472
2009-09-15	Periférico sur, entronque X' matkuil	Convolvulaceae	Merremia dissecta	1	1	21106.4	0.105071	0.177924	0.0165141	395	105 C - F	Cryptococcus laurentii var. laurentii	106 C - F
2009-09-15	Periférico sur, entronque X' matkuil	Convolvulaceae	Merremia dissecta	1	2	7420	0.271729	0.435876	0.102617	396	107 C - F	Hannaella siamensis
2009-09-15	Periférico sur, entronque X' matkuil	Convolvulaceae	Merremia dissecta	1	3	15255	0.0905428	0.142854	0.0767115	397	109 C - F	Sporidiobolus ruineniae
2009-09-15	Periférico sur, entronque X' matkuil	Convolvulaceae	Merremia dissecta	2	1	2775.38	0.708185	0.860389	0.827141	398	112 C - F	Cryptococcus laurentii var. laurentii
2009-09-15	Periférico sur, entronque X' matkuil	Convolvulaceae	Merremia dissecta	2	2	197125	0.20382	0.590863	0	399	114 C - F	Sporidiobolus ruineniae
2009-09-15	Periférico sur, entronque X' matkuil	Convolvulaceae	Merremia dissecta	2	3	4875	0.236584	0.447562	0	400	117 C - F	Hannaella siamensis
2009-09-23	Periférico sur, entronque X' matkuil	Convolvulaceae	Merremia dissecta	3	1	125875	0.00622855	0	0.0030587	401	119 C - F	Sporidiobolus ruineniae
2009-09-23	Periférico sur, entronque X' matkuil	Convolvulaceae	Merremia dissecta	3	2	26666.7	0	0	0	402	122 C - F	Cryptococcus sp. 3
2009-09-23	Periférico sur, entronque X' matkuil	Convolvulaceae	Merremia dissecta	3	3	5008.82	0.18131	0.27372	0	403	124 C - F	Sporidiobolus ruineniae
2009-09-29	Periférico sur, entronque X' matkuil (bloquera)	Convolvulaceae	Merremia dissecta	4	1	3160.2	0.22965	0.40567	0.142696	422	188 C - F	Rhodotorula paludigena
2009-09-29	Periférico sur, entronque X' matkuil (bloquera)	Convolvulaceae	Merremia dissecta	4	2	938.182	0.068739	0.208633	0.00942021	423	166 C - F	Cryptococcus sp. 2
2009-09-29	Periférico sur, entronque X' matkuil (bloquera)	Convolvulaceae	Merremia dissecta	4	3	1521.43	0.436425	0.498792	0.382021	424	169 C - F	Papilotrema rajasthanensis
2009-09-29	Periférico sur, entronque X' matkuil (bloquera)	Convolvulaceae	Merremia dissecta	5	1	4178.06	0.549175	0.654529	0.126541	425	170 C - F	Cryptococcus laurentii var. laurentii
2009-09-29	Periférico sur, entronque X' matkuil (bloquera)	Convolvulaceae	Merremia dissecta	5	2	630	0.12924	0.140528	0.0818668	426	171 C - F	Cryptococcus sp. 2
2009-09-29	Periférico sur, entronque X' matkuil (bloquera)	Convolvulaceae	Merremia dissecta	5	3	36615.4	0	0	0	427	172 C - F	Hannaella siamensis
2009-09-29	CFE	Convolvulaceae	Merremia dissecta	6	1	10142.9	0.12682	0.460266	0.0028433	428	173 C - F	Cryptococcus sp. 2
2009-09-29	CFE	Convolvulaceae	Merremia dissecta	6	2	917	0	0	0	429	174 C - F	Cryptococcus sp. 2
2009-09-29	CFE	Convolvulaceae	Merremia dissecta	6	3	10288.5	0.00708177	0.0861105	0.016629	430	175 C - F	Cryptococcus sp. 2
2009-09-29	Periférico sur, entronque X' matkuil (bloquera)	Convolvulaceae	Merremia dissecta	7	1	1116.67	0.31657	0.40236	0.19893	431	176 C - F	Cryptococcus laurentii var. laurentii
2009-09-29	Periférico sur, entronque X' matkuil (bloquera)	Convolvulaceae	Merremia dissecta	7	2	840	0.163307	0.236636	0.0717286	432	177 C - F	Ustilago sp.
2009-09-29	Periférico sur, entronque X' matkuil (bloquera)	Convolvulaceae	Merremia dissecta	7	3	2986.5	0.283504	0.403098	0.0925363	433	179 C - F	Cryptococcus sp. 2
2009-09-23	Periférico sur, entronque X' matkuil (bloquera)	Convolvulaceae	Operculina pinnatifida	1	1	1217.39	0.0266982	0.0047193	0	404	127 C - F	Kwoniella mangrovensis
2009-09-23	Periférico sur, entronque X' matkuil (bloquera)	Convolvulaceae	Operculina pinnatifida	1	2	220729	0.295022	0.396701	0.0763382	405	130 C - F	Cryptococcus laurentii var. laurentii
2009-09-23	Periférico sur, entronque X' matkuil (bloquera)	Convolvulaceae	Operculina pinnatifida	1	3	12833.3	0.00590277	0.0193581	0.170612	406	132 C - F	Cryptococcus laurentii var. laurentii
2009-09-23	Periférico sur, entronque X' matkuil (bloquera)	Convolvulaceae	Operculina pinnatifida	2	1	139750	0.00926913	0	0.0601975	407	134 C - F	Hannaella siamensis
2009-09-23	Periférico sur, entronque X' matkuil (bloquera)	Convolvulaceae	Operculina pinnatifida	2	2	9900	0.0776668	0.133449	0.766828	408	137 C - F	Wickerhamiella occidentalis
2009-09-23	Periférico sur, entronque X' matkuil (bloquera)	Convolvulaceae	Operculina pinnatifida	2	3	7350	0.0853924	0.186144	0.154859	409	139 C - F	Metschnikowia lochheadii
2009-09-23	Periférico sur, entronque X' matkuil (bloquera)	Convolvulaceae	Operculina pinnatifida	3	1	23200	0.455467	0.517021	0.185245	410	142 C - F	Metschnikowia ipomoeae
2009-09-23	Periférico sur, entronque X' matkuil (bloquera)	Convolvulaceae	Operculina pinnatifida	3	2	152	0.226144	0.294744	0.303127	411	143 C - F	Kwoniella mangrovensis
2009-09-23	Periférico sur, entronque X' matkuil (bloquera)	Convolvulaceae	Operculina pinnatifida	3	3	19929.4				412	144 C - F	Metschnikowia lochheadii
2009-09-23	Periférico sur, entronque X' matkuil (bloquera)	Convolvulaceae	Operculina pinnatifida	4	1	830.37	0.035533	0.0500671	0	413	145 C - F	Metschnikowia sp.
2009-09-23	Periférico sur, entronque X' matkuil (bloquera)	Convolvulaceae	Operculina pinnatifida	4	2	20683.3				414	148 C - F	Metschnikowia ipomoeae
2009-09-23	Periférico sur, entronque X' matkuil (bloquera)	Convolvulaceae	Operculina pinnatifida	4	3	582.609	0.336241	0.414706	0.0664441	415	150 C - F	Metschnikowia sp.
2009-09-29	Periférico sur, entronque X' matkuil (bloquera)	Convolvulaceae	Operculina pinnatifida	5	1	11306.7	0.135973	0.164068	0.114148	416	152 C - F	Cryptococcus laurentii var. laurentii
2009-09-29	Periférico sur, entronque X' matkuil (bloquera)	Convolvulaceae	Operculina pinnatifida	5	2	367.5	0.175951	0.233829	0.0569808	417	155 C - F	Metschnikowia lachancei
2009-09-29	Periférico sur, entronque X' matkuil (bloquera)	Convolvulaceae	Operculina pinnatifida	5	3	2418.71	0.334938	0.382957	0.130849	418	156 C - F	Cryptococcus laurentii var. laurentii
2009-09-29	Periférico sur, entronque X' matkuil (bloquera)	Convolvulaceae	Operculina pinnatifida	6	1	147.429				419	161 C - F	Metschnikowia ipomoeae
2009-09-29	Periférico sur, entronque X' matkuil (bloquera)	Convolvulaceae	Operculina pinnatifida	6	2	607.2	0.0497508	0.0812346	0	420	163 C - F	Metschnikowia lochheadii	185 C - F	Rhodotorula paludigena
2009-09-29	Periférico sur, entronque X' matkuil (bloquera)	Convolvulaceae	Operculina pinnatifida	6	3	40.8333				421	164 C - F	Metschnikowia ipomoeae
2009-05-14	Chuburna puerto	Cactaceae	Opuntia dillenii	1	1	0	3.3399	2.52769	1.60721	321
2009-05-14	Chuburna puerto	Cactaceae	Opuntia dillenii	1	2	27.5	4.73716	2.79273	1.46591	322	68 C -F	Kurtzmaniella cleridarum	69 C -F
2009-05-14	Chuburna puerto	Cactaceae	Opuntia dillenii	1	3	18125	2.89909	2.12695	1.27187	323	72 C -F	Kurtzmaniella cleridarum	73 C -F
2009-05-14	Chuburna puerto	Cactaceae	Opuntia dillenii	2	1	4731.43	10.1856	6.25992	2.58789	324
2009-05-14	Chuburna puerto	Cactaceae	Opuntia dillenii	2	2	2507	11.5806	7.99345	4.05778	325	78 C -F	Kurtzmaniella cleridarum	80 C -F	Candida nodaensis
2009-05-14	Chuburna puerto	Cactaceae	Opuntia dillenii	2	3	3886.67	8.10129	5.52997	3.08147	326
2009-05-14	Chuburna puerto	Cactaceae	Opuntia dillenii	3	1	1248.57	9.81101	6.17893	2.48444	327
2009-05-14	Chuburna puerto	Cactaceae	Opuntia dillenii	3	2	52392.9	1.42144	0.612167	0.0583019	328	81 C -F	Kurtzmaniella cleridarum
2009-05-14	Chuburna puerto	Cactaceae	Opuntia dillenii	3	3	10226.3	10.5008	7.00074	3.15778	329	83 C -F	Kurtzmaniella cleridarum
2009-05-14	Chuburna puerto	Cactaceae	Opuntia dillenii	4	1	0	8.51979	5.27687	1.95564	330
2009-05-14	Chuburna puerto	Cactaceae	Opuntia dillenii	4	2	1680	8.42218	6.1193	2.93009	331	86 C -F	Kurtzmaniella cleridarum
2009-05-14	Chuburna puerto	Cactaceae	Opuntia dillenii	4	4	5498.89	7.24679	4.35531	1.6546	332	88 C -F	Kurtzmaniella cleridarum
2009-05-14	Chuburna puerto	Cactaceae	Opuntia dillenii	5	1	1568.57	8.70121	4.79864	1.76905	333
2009-05-14	Chuburna puerto	Cactaceae	Opuntia dillenii	5	2	0	10.2049	6.87542	2.43561	334
2009-05-14	Chuburna puerto	Cactaceae	Opuntia dillenii	6	1	0	11.1431	6.07173	2.11148	335
2009-05-14	Chuburna puerto	Cactaceae	Opuntia dillenii	6	2	3578.18	9.47987	5.13661	1.9634	336
2009-05-14	Chuburna puerto	Cactaceae	Opuntia dillenii	6	3	67.7778	10.2612	5.08291	1.82189	337
2009-05-14	Chuburna puerto	Cactaceae	Opuntia dillenii	7	1	0	10.5779	4.91299	1.97173	338
2009-05-14	Chuburna puerto	Cactaceae	Opuntia dillenii	7	2	1255.88	8.98777	5.10573	2.28561	339
2009-05-14	Chuburna puerto	Cactaceae	Opuntia dillenii	7	3	0	8.28054	5.14458	2.68694	340
2009-05-14	Chuburna puerto	Cactaceae	Opuntia dillenii	8	1	48125	2.62918	1.60188	0.886878	341
2009-05-14	Chuburna puerto	Cactaceae	Opuntia dillenii	8	2	3461.67				394	91 C -F	Kurtzmaniella cleridarum
2009-05-14	Chuburna puerto	Cactaceae	Opuntia dillenii	8	3	1296				387	94 C -F	Kurtzmaniella cleridarum
2009-05-14	Chuburna puerto	Cactaceae	Opuntia dillenii	8	4	89571.4				388	97 C -F	Kurtzmaniella cleridarum
2009-05-14	Chuburna puerto	Cactaceae	Opuntia dillenii	8	5	258000				389	100 C -F	Kurtzmaniella cleridarum
2009-05-14	Chuburna puerto	Cactaceae	Opuntia dillenii	8	6	5392.59				390	102 C -F	Kurtzmaniella cleridarum
2009-05-14	Chuburna puerto	Cactaceae	Opuntia dillenii	9	1	0				391
2009-05-14	Chuburna puerto	Cactaceae	Opuntia dillenii	10	1	0				392
2009-05-15	Chuburna puerto	Cactaceae	Opuntia dillenii	10	2	75				393
2009-02-06	Carretera ProgresoTelchac	Passifloraceae	Passiflora foetida	1	1	70	11.5275	10.67	4.06459	119
2009-02-06	Carretera ProgresoTelchac	Passifloraceae	Passiflora foetida	1	2	4112.5	14.2338	13.6006	2.29244	120
2009-02-06	Carretera ProgresoTelchac	Passifloraceae	Passiflora foetida	1	3	13.913	12.5518	11.8159	1.51298	121
2009-02-25	Carretera ProgresoTelchac	Passifloraceae	Passiflora foetida	2	1	616.667	7.97588	8.711	2.33254	140	12C-F	Candida sorbosivorans	13C-F	Candida sorbosivorans	14C-F	Candida sorbosivorans
2009-02-25	Carretera ProgresoTelchac	Passifloraceae	Passiflora foetida	2	2	0	10.9718	10.2609	2.09468	141
2009-02-25	Carretera ProgresoTelchac	Passifloraceae	Passiflora foetida	2	3	195	7.72145	10.1194	1.91296	142
2009-02-25	Carretera ProgresoTelchac	Passifloraceae	Passiflora foetida	3	1	395.294				143
2009-02-25	Carretera ProgresoTelchac	Passifloraceae	Passiflora foetida	4	1	0	5.14569	6.70355	1.3607	144
2009-02-25	Carretera ProgresoTelchac	Passifloraceae	Passiflora foetida	4	2	0	2.56576	4.21282	2.36852	145
2009-02-25	Carretera ProgresoTelchac	Passifloraceae	Passiflora foetida	5	2	28.75	7.73257	7.35858	0.6014	146
2009-02-25	Carretera ProgresoTelchac	Passifloraceae	Passiflora foetida	6	1	0	10.2541	11.2091	2.61865	147
2009-02-25	Carretera ProgresoTelchac	Passifloraceae	Passiflora foetida	6	2	0	1.47644	2.28369	2.79002	148
2009-04-20	Uaymitun	Passifloraceae	Passiflora foetida	7	1	16.1111	8.74231	8.85881	1.84635	263	51C-F	Candida bombi	52C-F
2009-04-20	Uaymitun	Passifloraceae	Passiflora foetida	7	2	0	12.2871	12.3633	1.89733	264
2009-04-20	Uaymitun	Passifloraceae	Passiflora foetida	8	1	0	1.193	2.06622	2.58751	265
2009-04-20	Uaymitun	Passifloraceae	Passiflora foetida	8	2	0	1.05129	1.65942	2.06778	266
2009-03-24	CCBA-UADY-Xmatkuil	Fabaceae	Piscidia piscipula	1	1	46.3636	3.66538	3.17676	9.36972	227	42C-F	Vishniacozyma taibaiensis	43C-F	Vishniacozyma taibaiensis	44C-F	Vishniacozyma taibaiensis
2009-03-24	CCBA-UADY-Xmatkuil	Fabaceae	Piscidia piscipula	1	2	402.5	4.43451	4.18573	7.54407	228
2009-03-24	CCBA-UADY-Xmatkuil	Fabaceae	Piscidia piscipula	1	3	667.059	2.70356	2.11677	9.95398	229
2009-03-24	CCBA-UADY-Xmatkuil	Fabaceae	Piscidia piscipula	2	1	286.875	5.05169	4.84301	7.26959	230
2009-03-24	CCBA-UADY-Xmatkuil	Fabaceae	Piscidia piscipula	2	2	293.684	4.85205	4.43418	6.72416	231
2009-03-24	CCBA-UADY-Xmatkuil	Fabaceae	Piscidia piscipula	2	3	411.429	2.78114	2.96701	6.53809	232	45C-F-1	Naganishia liquefaciens	45C-F-2	Naganishia liquefaciens	46C-F-1	Naganishia liquefaciens	46C-F-2	Naganishia liquefaciens	46C-F-3	Naganishia liquefaciens	47C-F	Naganishia liquefaciens
2009-03-24	CCBA-UADY-Xmatkuil	Fabaceae	Piscidia piscipula	2	4	0	2.21333	2.4442	1.0538	233
2009-03-24	CCBA-UADY-Xmatkuil	Fabaceae	Piscidia piscipula	2	5	1114.62	2.35759	2.29264	11.548	234
2009-03-24	CCBA-UADY-Xmatkuil	Fabaceae	Piscidia piscipula	2	6	975.238	3.70871	3.54073	6.57315	235
2009-03-24	CCBA-UADY-Xmatkuil	Fabaceae	Piscidia piscipula	1	4	964.444	7.53581	6.35199	14.1066	236
2009-03-24	CCBA-UADY-Xmatkuil	Fabaceae	Piscidia piscipula	1	5	1368.89	5.25496	4.12829	12.9498	237
2009-03-24	CCBA-UADY-Xmatkuil	Fabaceae	Piscidia piscipula	1	6	0	3.18852	2.83851	6.17101	238
2009-03-31	CCBA-UADY-Xmatkuil	Fabaceae	Piscidia piscipula	3	1	0	3.04876	2.34458	10.61	239
2009-03-31	CCBA-UADY-Xmatkuil	Fabaceae	Piscidia piscipula	3	2	0	3.67849	3.54775	16.4457	240
2009-03-31	CCBA-UADY-Xmatkuil	Fabaceae	Piscidia piscipula	3	3	0	4.56771	4.21606	21.1869	241
2009-03-31	CCBA-UADY-Xmatkuil	Fabaceae	Piscidia piscipula	3	4	152.727	1.86687	1.90105	9.72726	242	48C-F	Sympodiomycopsis paphiopedili	49C-F	Sympodiomycopsis paphiopedili	50C-F	Sympodiomycopsis paphiopedili
2009-03-31	CCBA-UADY-Xmatkuil	Fabaceae	Piscidia piscipula	4	1	597.692	2.2854	1.80452	16.5095	243
2009-03-31	CCBA-UADY-Xmatkuil	Fabaceae	Piscidia piscipula	4	2	107.143	1.86261	1.57003	11.9169	244
2009-03-31	CCBA-UADY-Xmatkuil	Fabaceae	Piscidia piscipula	4	3	0	3.41973	3.0378	19.9743	245
2009-03-31	CCBA-UADY-Xmatkuil	Fabaceae	Piscidia piscipula	4	4	0	0.0634024	0.0626034	3.34624	246
2009-03-31	CCBA-UADY-Xmatkuil	Fabaceae	Piscidia piscipula	5	1	0	2.43162	2.24176	9.78714	247
2009-03-31	CCBA-UADY-Xmatkuil	Fabaceae	Piscidia piscipula	5	2	0	3.22158	3.19698	8.53362	248
2009-03-31	CCBA-UADY-Xmatkuil	Fabaceae	Piscidia piscipula	5	3	0	2.9577	2.94496	9.03243	249
2009-03-31	CCBA-UADY-Xmatkuil	Fabaceae	Piscidia piscipula	6	1	371.25	3.21437	3.3739	5.45781	250
2009-03-31	CCBA-UADY-Xmatkuil	Fabaceae	Piscidia piscipula	6	2	0	6.20931	5.12704	9.14099	251
2009-03-31	CCBA-UADY-Xmatkuil	Fabaceae	Piscidia piscipula	6	3	0	2.47978	2.28159	4.09983	252
2009-03-31	CCBA-UADY-Xmatkuil	Fabaceae	Piscidia piscipula	6	4	93.75	3.64441	3.49647	6.15016	253
2009-03-03	MolasDzoyaxe	Bignoniaceae	Tecoma stans	1	1	25.625	9.41479	8.77783	1.02189	165
2009-03-03	MolasDzoyaxe	Bignoniaceae	Tecoma stans	1	2	0	7.64777	8.12621	0.500535	166
2009-03-03	MolasDzoyaxe	Bignoniaceae	Tecoma stans	1	3	0	7.63496	8.0253	0.3889	167
2009-03-03	MolasDzoyaxe	Bignoniaceae	Tecoma stans	2	1	4322.81	10.7299	11.1664	0.941475	168	21C-F	Metschnikowia koreensis	22C-F-1	Metschnikowia koreensis	22C-F-2	Metschnikowia koreensis	23C-F	Metschnikowia koreensis
2009-03-03	MolasDzoyaxe	Bignoniaceae	Tecoma stans	2	2	0	10.8727	10.2806	1.05684	169
2009-03-03	MolasDzoyaxe	Bignoniaceae	Tecoma stans	2	3	0	8.92935	8.40199	0.660908	170
2009-03-03	camellón carretera frente CCBA	Bignoniaceae	Tecoma stans	3	1	32.5	9.95635	9.62803	0.557056	171	24C-F	Cryptococcus sp.	25C-F		26C-F
2009-03-03	camellón carretera frente CCBA	Bignoniaceae	Tecoma stans	3	2	31.25	9.31747	8.86462	0.824872	172	27C-F	Metschnikowia koreensis	28C-F	Metschnikowia koreensis	29C-F	Metschnikowia koreensis
2009-03-03	camellón carretera frente CCBA	Bignoniaceae	Tecoma stans	3	3	0	6.54621	6.23901	0.488817	173
2009-03-03	camellón carretera frente CCBA	Bignoniaceae	Tecoma stans	4	1	0	10.4137	10.2079	0.624836	174
2009-03-03	camellón carretera frente CCBA	Bignoniaceae	Tecoma stans	4	2	0	7.14093	8.44323	0.411675	175
2009-03-03	camellón carretera frente CCBA	Bignoniaceae	Tecoma stans	4	3	0	8.82614	8.66079	0.625669	176
2009-03-03	camellón carretera frente CCBA	Bignoniaceae	Tecoma stans	5	1	0	6.69214	6.58439	0.466731	177
2009-03-03	camellón carretera frente CCBA	Bignoniaceae	Tecoma stans	5	2	0	6.69373	7.61109	0.446053	178
2009-03-03	camellón carretera frente CCBA	Bignoniaceae	Tecoma stans	6	1	1397.5	9.26563	9.34382	0.580434	179	30C-F-1	Metschnikowia koreensis	30C-F-2	Metschnikowia koreensis	31C-F	Metschnikowia koreensis	32C-F-1	Metschnikowia koreensis	32C-F-2	Metschnikowia koreensis
2009-03-03	camellón carretera frente CCBA	Bignoniaceae	Tecoma stans	6	2	18.75	5.15069	5.45252	0.412134	180
2009-03-03	camellón carretera frente CCBA	Bignoniaceae	Tecoma stans	6	3	0	6.47747	6.23558	0.451653	181
2009-03-10	camellón carretera frente CCBA	Bignoniaceae	Tecoma stans	7	1	0	7.12136	7.00523	0.625496	195
2009-03-10	camellón carretera frente CCBA	Bignoniaceae	Tecoma stans	7	2	6300	3.79136	6.44733	0.125162	196	33C-F	Metschnikowia koreensis	34C-F	Metschnikowia koreensis	35C-F	Metschnikowia koreensis
2009-03-10	camellón carretera frente CCBA	Bignoniaceae	Tecoma stans	7	3	4863.08	8.13894	7.81152	0.569923	197	36C-F	Metschnikowia ipomoeae	37C-F	Metschnikowia ipomoeae	38C-F	Metschnikowia ipomoeae
